# Supplementary material for: Real-world visual outcomes of cataract surgery based on population-based studies: a systematic review
Source: PubMed Central journal article supplement — Br J Ophthalmol. 2022 Apr 11;107(8):1056–65. doi: 10.1136/bjophthalmol-2021-320997 (PMC10359559; doi:10.1136/bjophthalmol-2021-320997), 2022-04-11
Supplement: bjophthalmol-2021-320997supp001.pdf [file bjophthalmol-2021-320997supp001.pdf]

## PUBMED

(((((cataract[MeSH Terms]) OR (cataract extraction[MeSH Terms])) OR ((((((cataract surgery) OR (cataract extraction)) OR (cataract operation)) OR (phaco)) OR (phacoemulsification)) OR (small incision cataract))) AND ((population-based) OR (planning, population based[MeSH Terms]))) AND (((((((((visual acuity) OR (vision)) OR (refractive error)) OR (refraction)) OR (complication)) OR (surgical outcome)) OR (intraocular pressure)) OR (outcome)) OR (prognosis))
