# Supplementary material for: Real-world visual outcomes of cataract surgery based on population-based studies: a systematic review
Source: PubMed Central journal article supplement — Br J Ophthalmol. 2022 Apr 11;107(8):1056–65. doi: 10.1136/bjophthalmol-2021-320997 (PMC10359559; doi:10.1136/bjophthalmol-2021-320997), 2022-04-11
Supplement: bjophthalmol-2021-320997supp002.pdf [file bjophthalmol-2021-320997supp002.pdf]

**Supplemental Table.** Bias assessment of included studies.

| First author                                                        | Year | Selection | Comparability | Outcome |
|---------------------------------------------------------------------|------|-----------|---------------|---------|
| <b>Cross-sectional studies in low- and middle-income countries</b>  |      |           |               |         |
| Bourne R                                                            | 2007 | ****      | NA            | ***     |
| Lindfield R                                                         | 2008 | ****      | NA            | ***     |
| Salomão SR                                                          | 2009 | ****      | NA            | ***     |
| Murthy GV                                                           | 2009 | ****      | NA            | ***     |
| Kandel RP                                                           | 2010 | ****      | NA            | ***     |
| Vijaya L                                                            | 2010 | ****      | NA            | ***     |
| Imam AU                                                             | 2011 | ****      | NA            | ***     |
| Nangia V                                                            | 2011 | ****      | NA            | ***     |
| Thapa SS                                                            | 2011 | ****      | NA            | ***     |
| Brian G                                                             | 2011 | ****      | NA            | ***     |
| Khanna RC                                                           | 2012 | ****      | NA            | ***     |
| Odugbo OP                                                           | 2012 | ****      | NA            | ***     |
| Li EY                                                               | 2013 | ****      | NA            | ***     |
| Li Z                                                                | 2014 | ****      | NA            | ***     |
| Katibeh M                                                           | 2014 | ****      | NA            | ***     |
| Mörchen M                                                           | 2015 | ****      | NA            | ***     |
| Pawiroredjo JC                                                      | 2016 | ****      | NA            | ***     |
| Marmamula S                                                         | 2016 | ****      | NA            | ***     |
| Paul P                                                              | 2016 | ****      | NA            | ***     |
| Zhang X                                                             | 2017 | ****      | NA            | ***     |
| Zhang G                                                             | 2018 | ****      | NA            | ***     |
| Thoufeeq U                                                          | 2018 | ****      | NA            | ***     |
| Zhao J                                                              | 2018 | ****      | NA            | ***     |
| Jiachu D                                                            | 2019 | ****      | NA            | ***     |
| Watanabe SES                                                        | 2019 | ****      | NA            | ***     |
| Shen W                                                              | 2020 | ****      | NA            | ***     |
| <b>Cross-sectional studies in High-income countries<sup>a</sup></b> |      |           |               |         |
| Barañano AE                                                         | 2008 | ****      | NA            | ***     |
| Lavanya R                                                           | 2009 | ****      | NA            | ***     |
| Gupta P                                                             | 2013 | ****      | NA            | ***     |
| Keel S                                                              | 2018 | ****      | NA            | ***     |
| Owen JP                                                             | 2021 | ****      | NA            | ***     |
| <b>Cohort studies</b>                                               |      |           |               |         |
| The Beijing Eye Study                                               | -    | ***       | NA            | ***     |
| The Blue Mountains Eye Study                                        | -    | ***       | NA            | ***     |
| The Liwan Eye study                                                 | -    | ***       | NA            | ***     |
| Sweden cohort                                                       | -    | ***       | NA            | ***     |

NA, not applicable.
